# Supplementary material for: Role of METTL3 protein in asthma: Insights from transcriptomic profiling and molecular docking analysis
Source: Research Square preprint supplement (doi:10.21203/rs.3.rs-5768620/v1), 2025-01-09
Supplement: Supplementary file 1 [file 6020601054599a8d77a0d5dd.docx]

**Supplementary Table 1** m6A-related gene

| Gene | Type |
| --- | --- |
| METTL3 | writers |
| METTL14 | writers |
| METTL16 | writers |
| WTAP | writers |
| VIRMA | writers |
| ZC3H13 | writers |
| RBM15 | writers |
| RBM15B | writers |
| CBLL1 | writers |
| YTHDC1 | readers |
| YTHDC2 | readers |
| YTHDF1 | readers |
| YTHDF2 | readers |
| YTHDF3 | readers |
| HNRNPC | readers |
| FMR1 | readers |
| LRPPRC | readers |
| HNRNPA2B1 | readers |
| IGFBP1 | readers |
| IGFBP2 | readers |
| IGFBP3 | readers |
| RBMX | readers |
| ELAVL1 | readers |
| IGF2BP1 | readers |
| FTO | erasers |
| ALKBH5 | erasers |
